# Supplementary material for: Switching of magnetic properties by topotactic reaction in a 1D CN-bridged Ni(ii)–Nb(iv) system
Source: Royal Society of Chemistry journal article supplement (doi:10.1039/d3dt03891b), 2024-01-01
Supplement: d3dt03891b1.pdf [file d3dt03891b1.pdf]

Supporting Information for

# Switching of magnetic properties by topotactic reaction in a 1D CN-bridged Ni(II)-Nb(IV) system

Michał Heczko and Beata Nowicka\*

Faculty of Chemistry, Jagiellonian University, Gronostajowa 2, 30-387 Kraków, Poland

\*beata.nowicka@uj.edu.pl

Contents:

|                                                                                                                                                                                                                                                                                                |    |
|------------------------------------------------------------------------------------------------------------------------------------------------------------------------------------------------------------------------------------------------------------------------------------------------|----|
| <b>Figure S1.</b> Powder X-ray diffraction patterns of compound <b>1</b> measured under various conditions in comparison with the patterns of <b>1</b> and <b>2</b> calculated from SC-XRD models at 100 K.....                                                                                | 2  |
| <b>Figure S2.</b> Thermogravimetric analysis for compound <b>1</b> with initial isothermal step.....                                                                                                                                                                                           | 2  |
| <b>Figure S3.</b> Thermogravimetric analysis for compounds <b>1</b> and <b>2</b> .....                                                                                                                                                                                                         | 2  |
| <b>Table S1.</b> Continuous Shape Measure (CSHM) parameters for the octa-coordinated niobium centers ...                                                                                                                                                                                       | 3  |
| <b>Table S2.</b> Continuous Shape Measure (CSHM) parameters for the hexa-coordinated nickel centers.....                                                                                                                                                                                       | 3  |
| <b>Table S3.</b> Continuous Shape Measure (CSHM) parameters for the tetra-coordinated lithium centers ....                                                                                                                                                                                     | 3  |
| <b>Figure S4.</b> The asymmetric unit of <b>1</b> .....                                                                                                                                                                                                                                        | 4  |
| <b>Table S4.</b> Selected interatomic distances and bond angles in the structures of <b>1</b> and <b>2</b> .....                                                                                                                                                                               | 4  |
| <b>Table S5.</b> Hydrogen-bonds geometry in compound <b>1</b> .....                                                                                                                                                                                                                            | 5  |
| <b>Table S6.</b> Hydrogen-bonds geometry in compound <b>2</b> .....                                                                                                                                                                                                                            | 5  |
| <b>Figure S5.</b> The structure of <b>1</b> viewed along [010] crystallographic direction showing the chains composed of $[\text{Nb}(\text{CN})_8]^{4-}$ and $[\text{Li}(\text{H}_2\text{O})_2]^+$ ions connected through the $[\text{Ni}(\text{cyclam})]^{2+}$ complex ion.....               | 5  |
| <b>Figure S6.</b> The asymmetric unit of <b>2</b> .....                                                                                                                                                                                                                                        | 6  |
| <b>Figure S7.</b> The structure of <b>2</b> viewed along [100] crystallographic direction showing the parallel layers composed of $[\text{Nb}(\text{CN})_8]^{4-}$ and $[\text{Li}_2(\text{H}_2\text{O})_2]^{2+}$ ions connected through the $[\text{Ni}(\text{cyclam})]^{2+}$ complex ion..... | 6  |
| <b>Figure S8.</b> Magnetic properties of <b>1</b> .....                                                                                                                                                                                                                                        | 7  |
| <b>Figure S9.</b> Magnetic properties of <b>1d</b> .....                                                                                                                                                                                                                                       | 8  |
| <b>Figure S10.</b> Magnetic properties of <b>2</b> .....                                                                                                                                                                                                                                       | 9  |
| <b>Figure S11.</b> Magnetic phase diagrams for compounds <b>1</b> and <b>2</b> .....                                                                                                                                                                                                           | 10 |
| <b>Table S7.</b> Comparison of magnetic exchange constants.....                                                                                                                                                                                                                                | 10 |

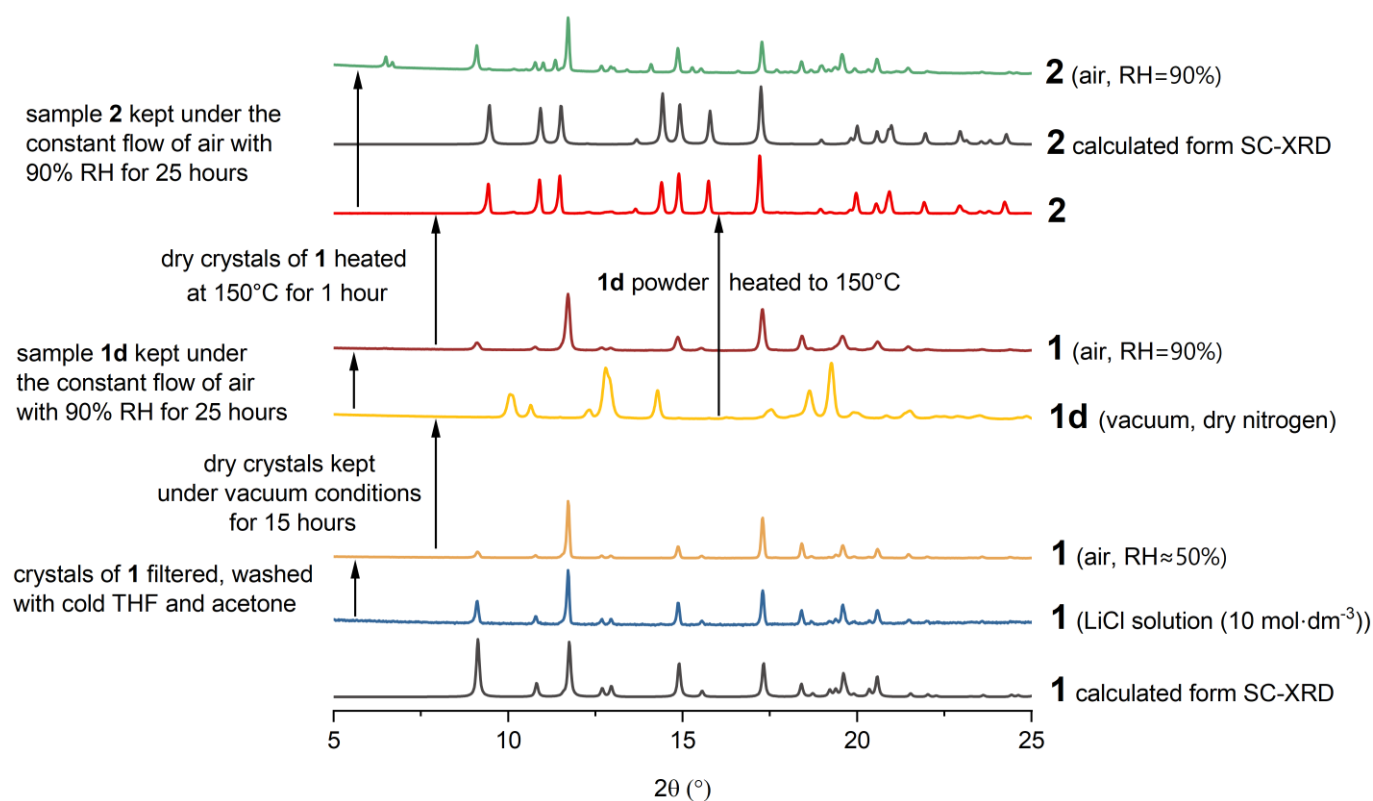

**Figure S1.** Powder X-ray diffraction patterns of compound **1** measured under various conditions in comparison with the patterns of **1** and **2** calculated from SC-XRD models at 100 K. Top graph (green) shows that the transition from **2** to **1** is accompanied by partial recrystallization to the neutral Ni<sub>2</sub>Nb polymer (ref. 32).

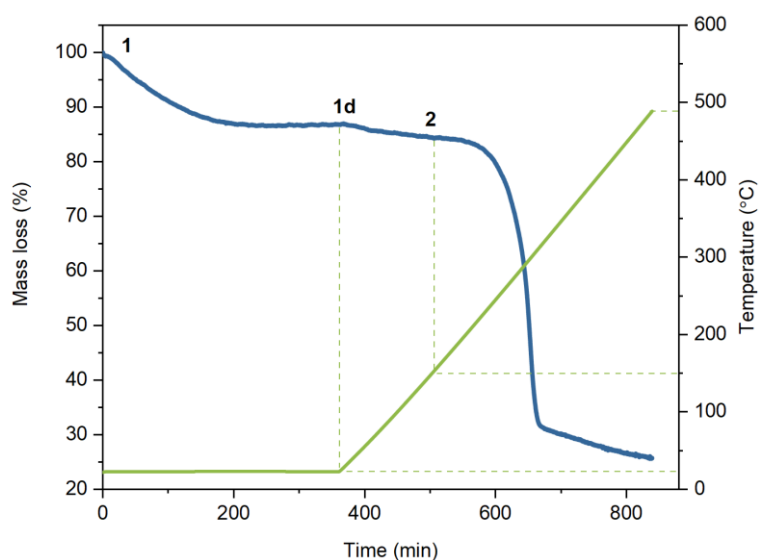

**Figure S2.** Thermogravimetric analysis for compound **1** measured under dry nitrogen flow (20 cm<sup>3</sup>/min). The measurement began from the 6-hour isothermal step, then the temperature was increased from 25°C to 490°C at the heating rate of 2°C/min.

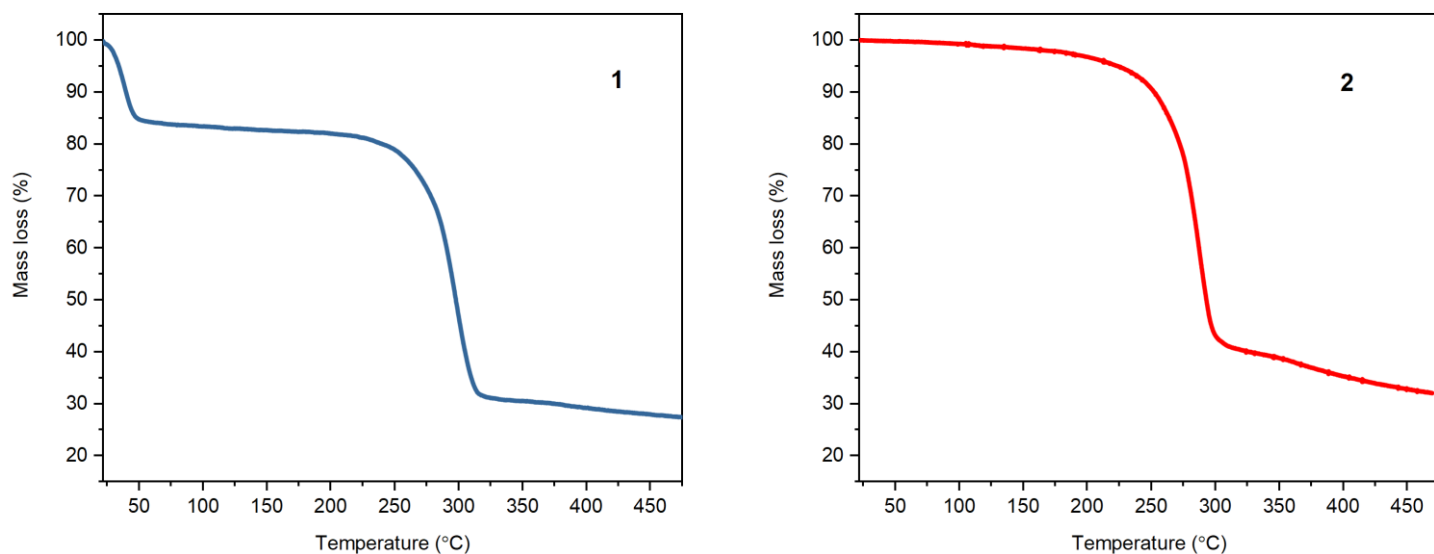

**Figure S3.** Thermogravimetric analysis for compounds **1** and **2** measured under dry nitrogen flow ( $20 \text{ cm}^3/\text{min}$ ) at the heating rate of  $2^\circ\text{C}/\text{min}$ .

**Table S1.** Continuous Shape Measure (CShM) parameters (the lowest four) for the octa-coordinated niobium centers in compounds **1** and **2**.

|          |     | SAPR-8 | TDD-8 | BTPR-8 | JSD-8 |
|----------|-----|--------|-------|--------|-------|
| <b>1</b> | Nb1 | 0.114  | 2.430 | 2.088  | 4.952 |
| <b>2</b> | Nb1 | 1.807  | 0.374 | 1.975  | 2.761 |

CShM = 0 indicates an ideal geometry; SAPR-8 = square antiprism, TDD-8 = triangular dodecahedron, BTPR-8 = biaugmented trigonal prism, JSD-8 = snub disphenoid.

**Table S2.** Continuous Shape Measure (CShM) parameters (the lowest four) for the hexa-coordinated nickel centers in compounds **1** and **2**.

|          |     | HP-6 ( $D_{6h}$ ) | PPY-6 ( $C_{5v}$ ) | OC-6 ( $O_h$ ) | TPR-6 ( $D_{3h}$ ) |
|----------|-----|-------------------|--------------------|----------------|--------------------|
| <b>1</b> | Ni1 | 30.182            | 28.837             | 0.154          | 16.236             |
| <b>2</b> | Ni1 | 29.992            | 28.786             | 0.193          | 15.950             |

CShM = 0 indicates an ideal geometry; HP-6 = hexagon; PPY-6 = pentagonal pyramid; OC-6 = octahedron; TPR-6 = trigonal prism.

**Table S3.** Continuous Shape Measure (CShM) parameters for the tetra-coordinated lithium centers in compounds **1** and **2**.

|          |     | SP-4 ( $D_{4h}$ ) | T-4 ( $T_d$ ) | SS-4 ( $C_{2v}$ ) | vTBPY-4 ( $C_{3v}$ ) |
|----------|-----|-------------------|---------------|-------------------|----------------------|
| <b>1</b> | Li1 | 27.363            | 0.611         | 6.707             | 3.094                |
| <b>2</b> | Li1 | 31.775            | 1.841         | 7.020             | 3.654                |

CShM = 0 indicates an ideal geometry; SP-4 = square, T-4 = tetrahedron, SS-4 = seesaw, vTBPY-4 = vacant trigonal bipyramid.

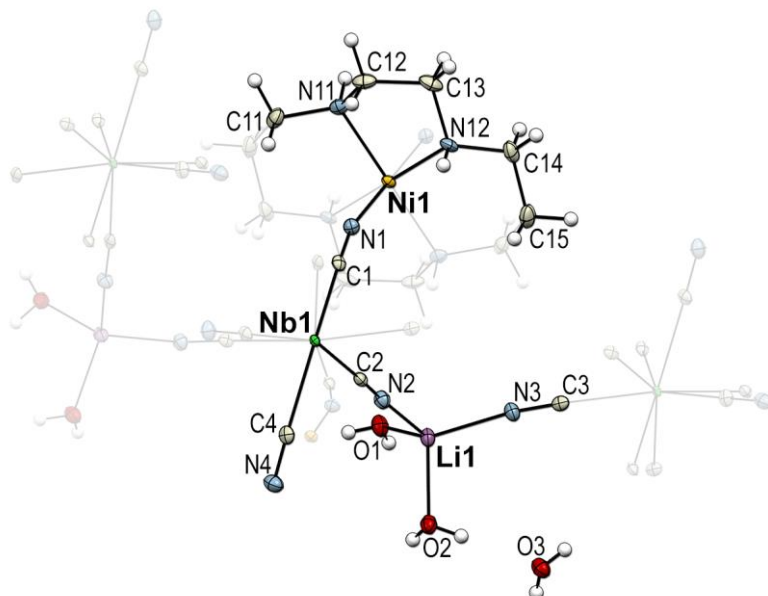

**Figure S4.** The asymmetric unit of **1**; thermal ellipsoids shown at 50% probability.

**Table S4.** Selected interatomic distances and bond angles in the structures of **1** and **2**.

|                                     | <b>1</b>                                   | <b>2</b>                                   |
|-------------------------------------|--------------------------------------------|--------------------------------------------|
| Distance between metal centers (Å)  | Ni1-Nb1: 5.4169(3)                         | Ni1-Nb1: 5.3276(2)                         |
| Ni-N <sub>CN</sub> distance (Å)     | Ni1-N1: 2.1044(17)                         | Ni1-N1: 2.0643(16)                         |
| Ni-N <sub>cyclam</sub> distance (Å) | Ni1-N11: 2.0823(17)<br>Ni1-N12: 2.0718(17) | Ni1-N11: 2.0843(18)<br>Ni1-N12: 2.0683(18) |
| Ni-N≡C angle (°)                    | Ni1-N1≡C1: 162.33(16)                      | Ni1-N1≡C1: 156.28(16)                      |
| Nb-C≡N angle (°)                    | Nb1-C1≡N1: 174.55(17)                      | Nb1-C1≡N1: 177.94(17)                      |

**Table S5.** Hydrogen-bonds geometry in compound **1**.

| D—H...A                     | D—H (Å) | H...A (Å) | D...A (Å) | D—H...A (°) |
|-----------------------------|---------|-----------|-----------|-------------|
| C11—H11B...N1               | 0.99    | 2.69      | 3.219(3)  | 114         |
| N12—H12...O3 <sup>iii</sup> | 1.00    | 2.11      | 3.032(2)  | 152         |
| O1—H1B...N4 <sup>v</sup>    | 0.79(3) | 2.17(3)   | 2.941(2)  | 169(3)      |
| O2—H2A...N2 <sup>v</sup>    | 0.78(3) | 2.46(3)   | 3.158(2)  | 149(2)      |
| O2—H2B...O3                 | 0.79(3) | 1.96(3)   | 2.743(2)  | 176(3)      |
| O3—H3A...N3 <sup>vi</sup>   | 0.74(3) | 2.45(3)   | 3.177(2)  | 167(3)      |
| O3—H3B...N4 <sup>vii</sup>  | 0.79(3) | 2.08(3)   | 2.832(3)  | 159(3)      |

Symmetry codes: (iii)  $-x+1, -y+1, -z+1$ ; (v)  $-x+1, -y+2, -z+1$ ; (vi)  $-x+3/2, y, -z+3/2$ ; (vii)  $x+1/2, -y+2, z+1/2$ .

**Table S6.** Hydrogen-bonds geometry in compound **2**.

| D—H...A                   | D—H (Å) | H...A (Å) | D...A (Å) | D—H...A (°) |
|---------------------------|---------|-----------|-----------|-------------|
| N12—H12...N4 <sup>i</sup> | 1.00    | 2.50      | 3.354(3)  | 144         |
| O1—H1A...N4 <sup>ix</sup> | 0.78(3) | 2.00(3)   | 2.778(2)  | 175(2)      |

Symmetry codes: (i)  $-x+1, y, -z+3/2$ ; (ix)  $-x+1/2, -y+3/2, -z+2$ .

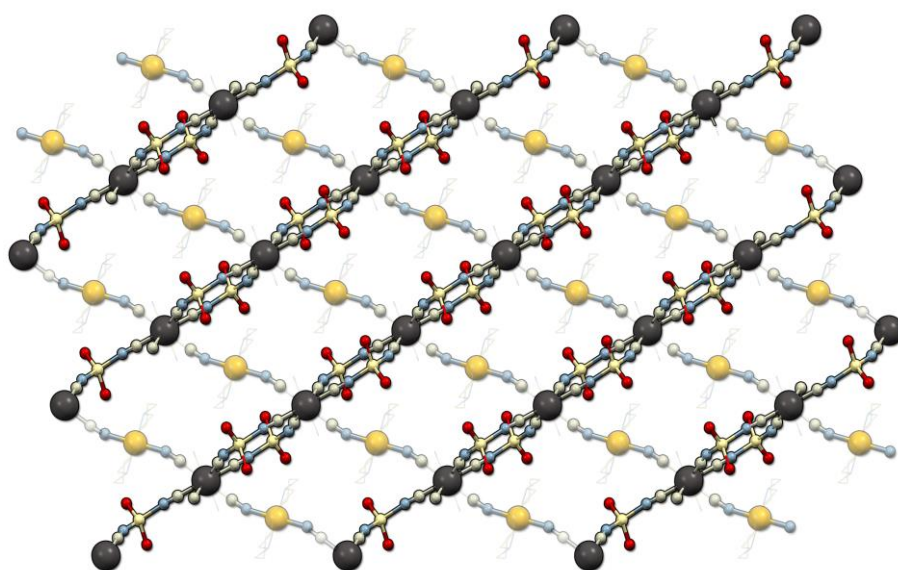**Figure S5.** The structure of **1** viewed along [010] crystallographic direction showing the chains composed of  $[\text{Nb}(\text{CN})_8]^{4-}$  and  $[\text{Li}(\text{H}_2\text{O})_2]^+$  ions connected through the  $[\text{Ni}(\text{cyclam})]^{2+}$  complex ion.

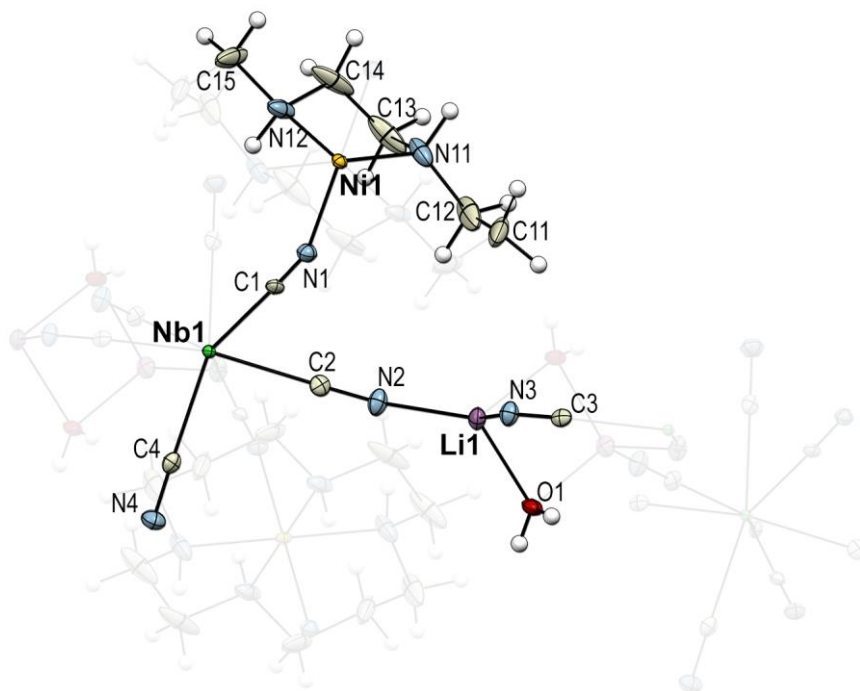

Figure S6. The asymmetric unit of **2**; thermal ellipsoids shown at 50% probability.

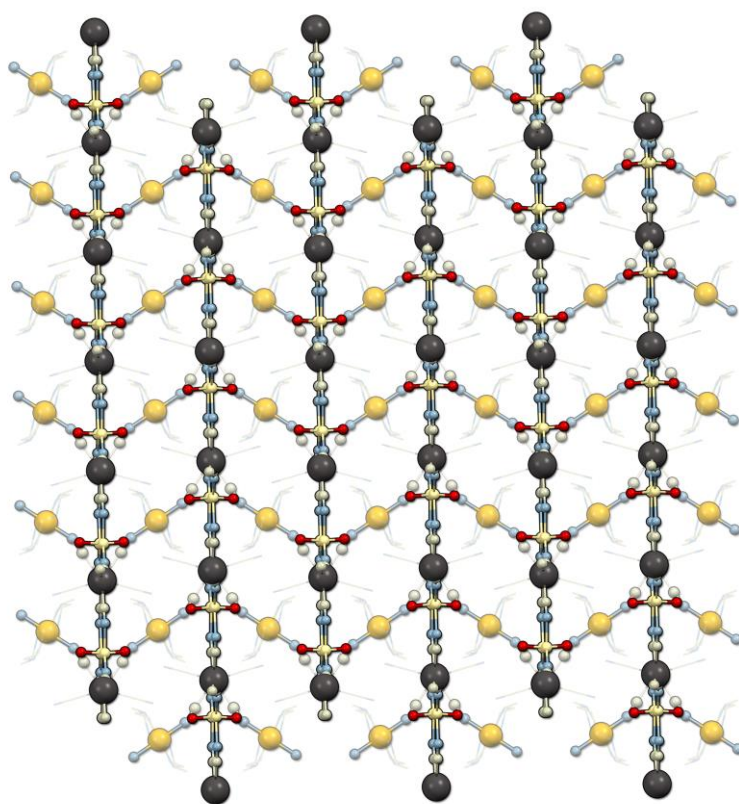

Figure S7. The structure of **2** viewed along [100] crystallographic direction showing the parallel layers composed of  $[\text{Nb}(\text{CN})_8]^{4-}$  and  $[\text{Li}_2(\text{H}_2\text{O})_2]^{2+}$  ions connected through the  $[\text{Ni}(\text{cyclam})]^{2+}$  complex ion.

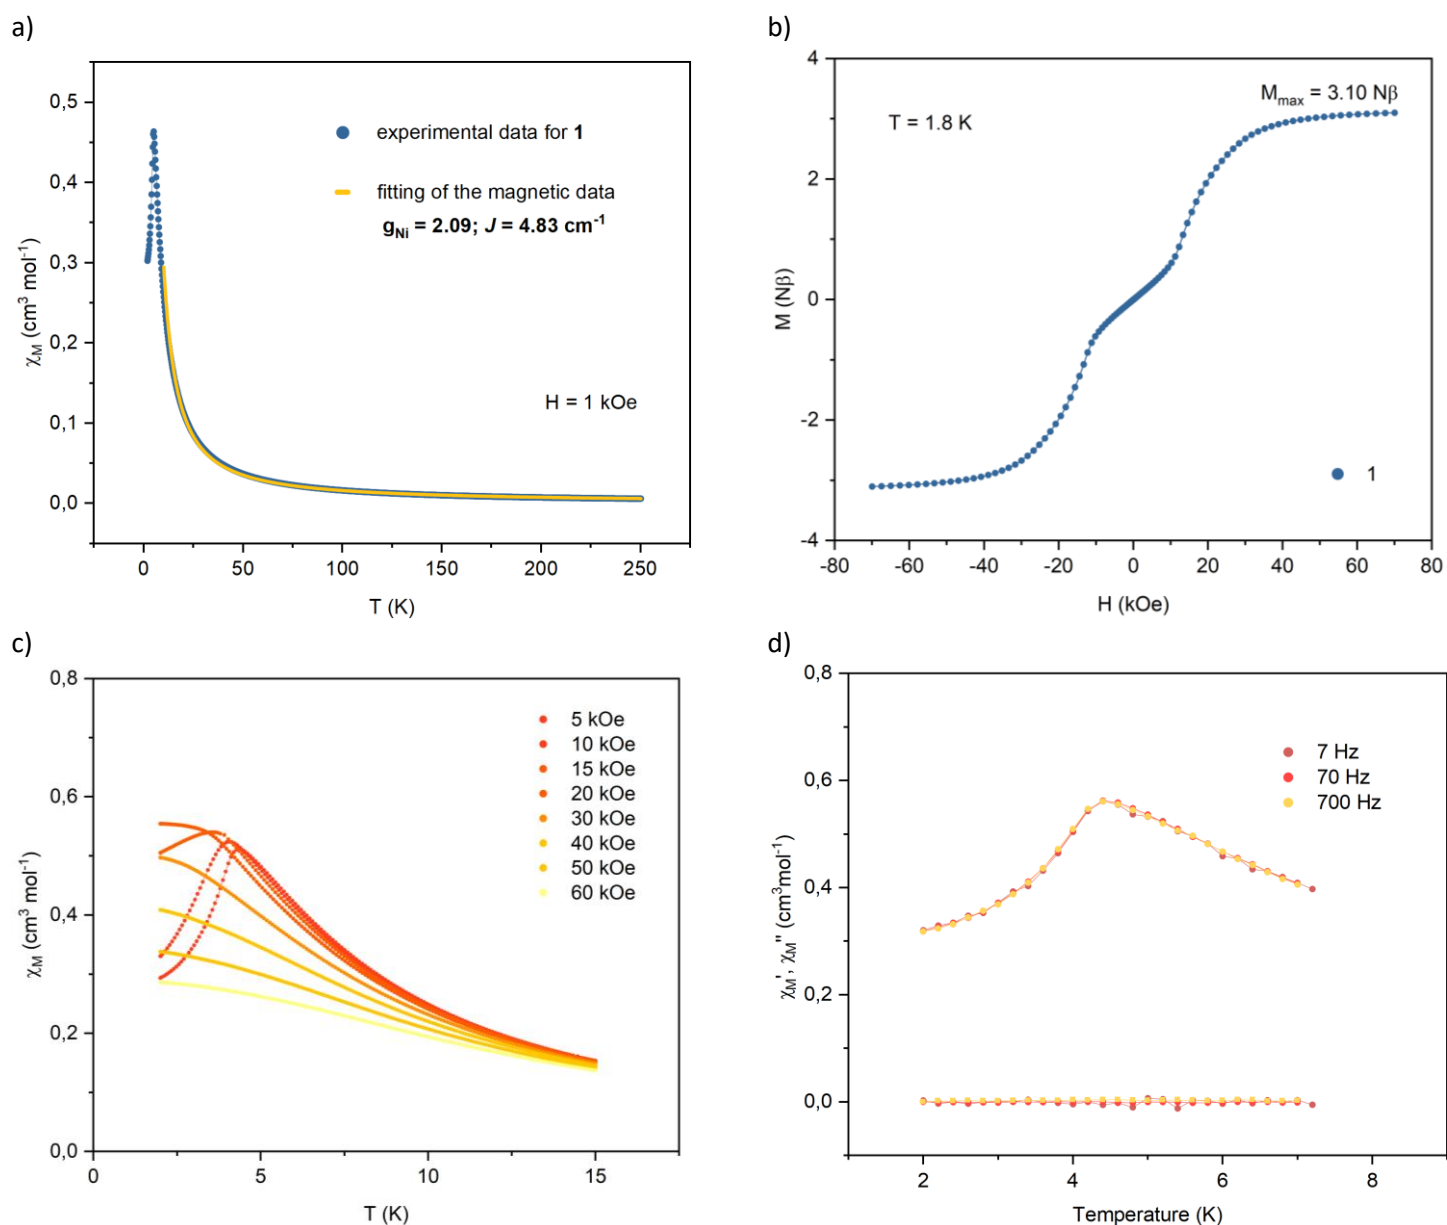

**Figure S8.** Magnetic properties of **1**: (a) DC susceptibility at 1 kOe, line represents fitting above 10K with fixed  $g_{\text{Ni}} = 2.00$ ; (b) magnetization at 1.8K, (c) field-cooled (FC) magnetic susceptibility at different fields, (d) AC susceptibility ( $H_{\text{AC}} = 1 \text{ Oe}$ ,  $H_{\text{DC}} = 0$ ).

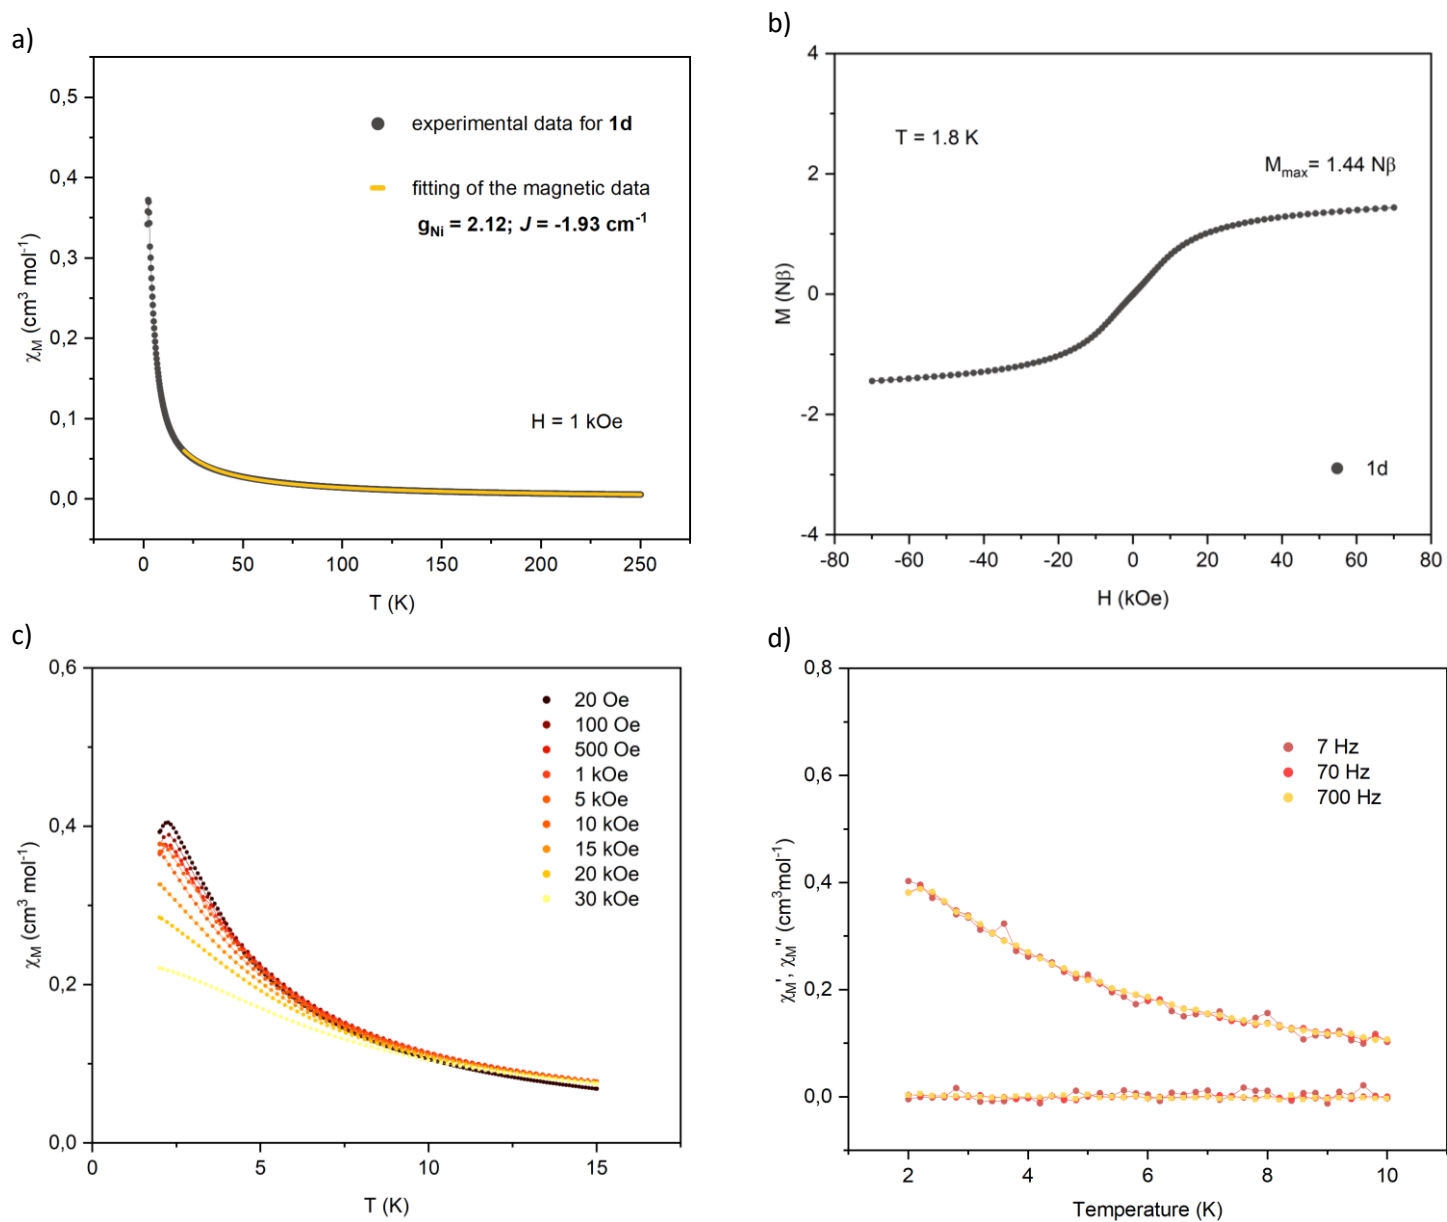

**Figure S9.** Magnetic properties of **1d**: (a) DC susceptibility at 1 kOe, line represents fitting above 30K with fixed  $g_{Nb} = 2.00$ ; (b) magnetization at 1.8K, (c) field-cooled (FC) magnetic susceptibility at different fields, (d) AC susceptibility ( $H_{AC} = 1$  Oe,  $H_{DC} = 0$ ).



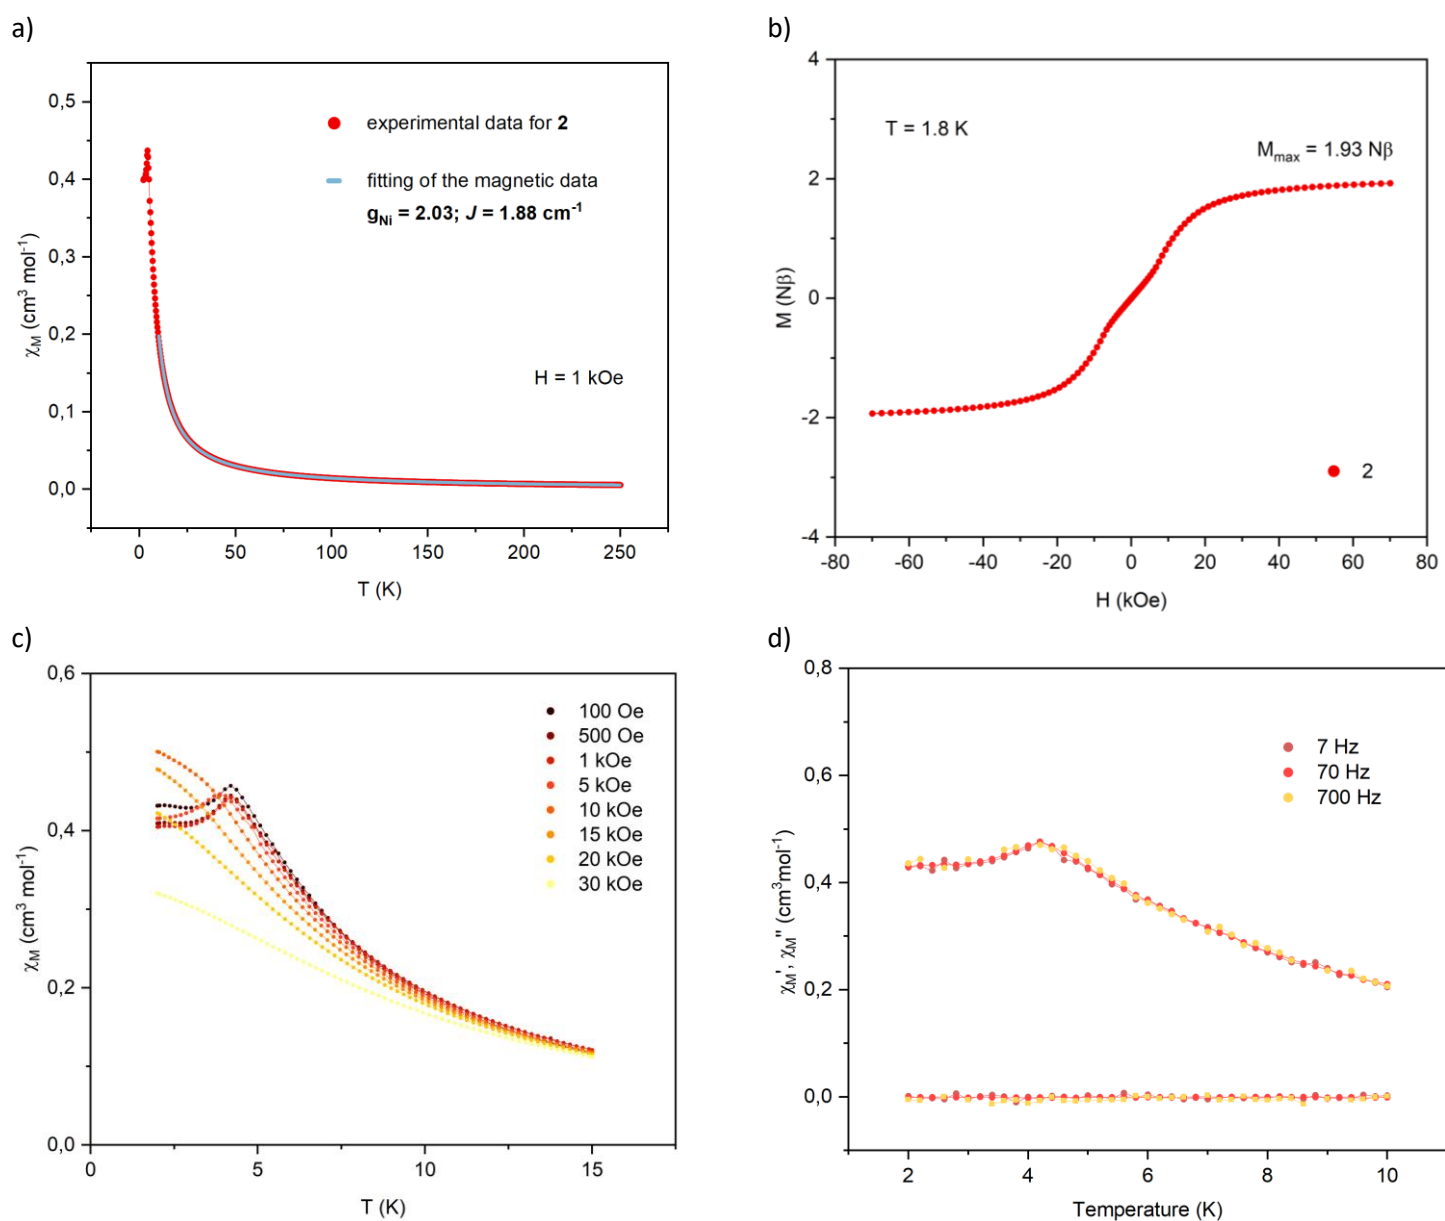

**Figure S10.** Magnetic properties of **2**: (a) DC susceptibility at 1 kOe, line represents fitting above 10K with fixed  $g_{\text{Nb}} = 2.00$ ; (b) magnetization at 1.8K, (c) field-cooled (FC) magnetic susceptibility at different fields, (d) AC susceptibility ( $H_{\text{AC}} = 1 \text{ Oe}$ ,  $H_{\text{DC}} = 0$ ).

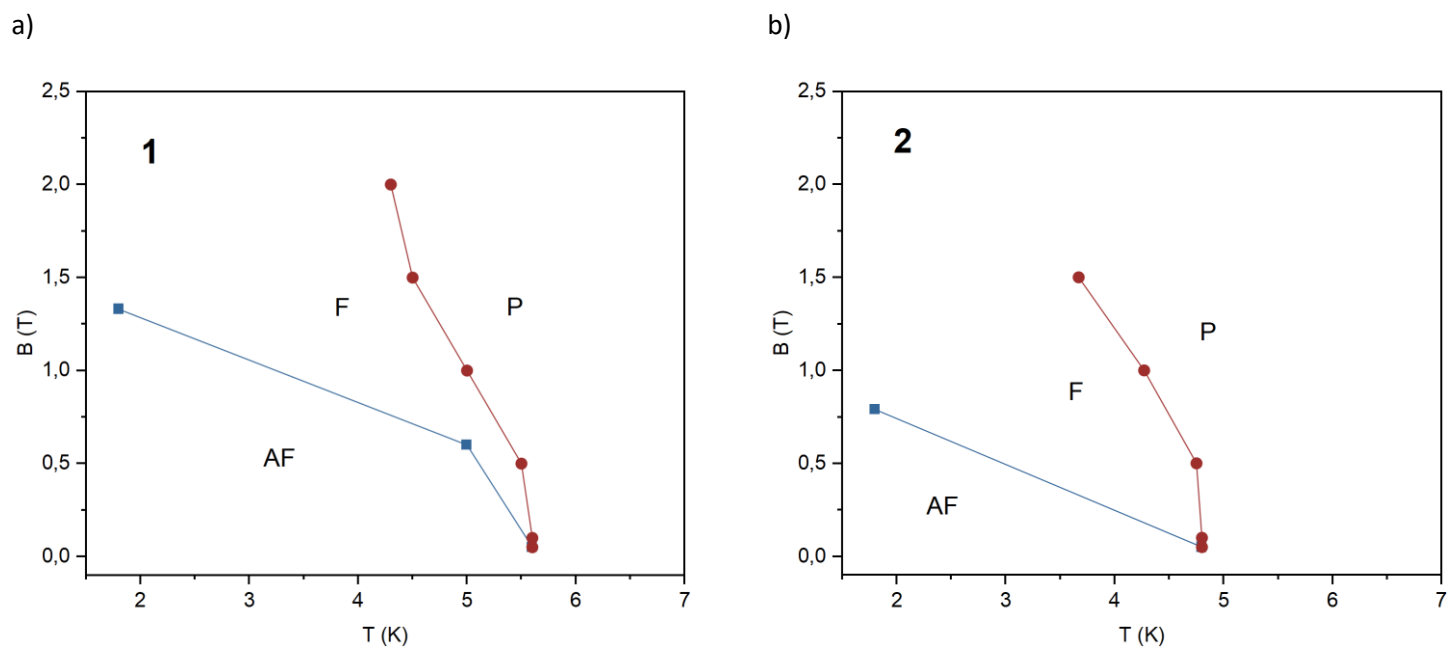

**Figure S11.** Magnetic phase diagrams for compounds **1** and **2**; AF - antiferromagnetic phase, F - ferromagnetic phase, P - paramagnetic phase. Squares mark the critical field of metamagnetic transition derived from magnetization vs. field measurements at indicated temperatures, circles mark the critical temperature derived from magnetic susceptibility vs. temperature measurements at different magnetic fields. The connecting lines are drawn to guide the eye.

**Table S7.** Comparison of magnetic exchange constants and bridge angles in Ni<sup>II</sup>-Nb<sup>IV</sup> CN-bridged systems.

| Compound                                                                                         | dimensionality | $J$ (cm <sup>-1</sup> ) | Ni-N≡C angle (°) | reference |
|--------------------------------------------------------------------------------------------------|----------------|-------------------------|------------------|-----------|
| [Ni(4-bromopyridine) <sub>4</sub> ] <sub>2</sub> [Nb(CN) <sub>8</sub> ]·2H <sub>2</sub> O        | (3D)           | 9.6                     | 176.3            | 36        |
| [Ni(pyrazole) <sub>4</sub> ] <sub>2</sub> [Nb(CN) <sub>8</sub> ] <sub>3</sub> ·4H <sub>2</sub> O | (3D)           | 8.1                     | 164.4            | 7         |
| Li <sub>2</sub> [Ni(cyclam)][Nb(CN) <sub>8</sub> ]·7.5H <sub>2</sub> O ( <b>1</b> )              | (1D)           | 4.8                     | 162.3            | this work |
| Li <sub>2</sub> [Ni(cyclam)][Nb(CN) <sub>8</sub> ]·2H <sub>2</sub> O ( <b>2</b> )                | (1D)           | 1.9                     | 156.3            | this work |
